# Supplementary material for: Methodology for Simultaneous Analysis of Photocatalytic deNOx Products
Source: MDPI journal article supplement (doi:10.3390/catal12060661), 2022-06-16
Supplement: s1 [file s1]

# Methodology for Simultaneous Analysis of Photocatalytic deNO<sub>x</sub> Products

Jan Suchanek, Eva Vaneckova, Michal Dostal, Eliska Mikyskova, Libor Brabec, Radek Zouzelka and Jiri Rathousky \*

Center for Innovations in the Field of Nanomaterials and Nanotechnologies, J. Heyrovsky Institute of Physical Chemistry of the CAS, Dolejskova 2155/3, 182 23 Prague 8, Czech Republic; jan.suchanek@jh-inst.cas.cz (J.S.); eva.vaneckova@jh-inst.cas.cz (E.V.); michal.dostal@jh-inst.cas.cz (M.D.); eliska.mikyskova@jh-inst.cas.cz (E.M.); libor.brabec@jh-inst.cas.cz (L.B.); radek.zouzelka@jh-inst.cas.cz (R.Z.)

\* Correspondence: jiri.rathousky@jh-inst.cas.cz

**Abstract:** The ISO standard 22197-1:2016 used for the evaluation of the photocatalytic nitric oxide removal has a main drawback, which allows only the decrease of nitric oxide to be determined specifically. The remaining amount, expressed as “NO<sub>2</sub>”, is considered as a sum of HNO<sub>3</sub>, HONO NO<sub>2</sub>, and other nitrogen-containing species, which can be potentially formed during the photocatalytic reaction. Therefore, we developed a new methodology combining our custom-made analyzers, which can accurately determine the true NO<sub>2</sub> and HONO species, with the conventional NO one. Their function was validated via a photocatalytic experiment in which 100 ppbv of either NO or NO<sub>2</sub> dispersed in air passed over (3 L min<sup>-1</sup>) an Aeroxide® TiO<sub>2</sub> P25 surface. The gas-phase analysis was complemented with the spectrophotometric determination of nitrates (NO<sub>3</sub><sup>-</sup>) and/or nitrites (NO<sub>2</sub><sup>-</sup>) deposited on the P25 layer. Importantly, an almost perfect mass balance (94%) of the photocatalytic NO<sub>x</sub> abatement was achieved. The use of custom-made analyzers enables to obtain (i) no interference, (ii) high sensitivity, (iii) good linearity in the relevant concentration range, (iv) rapid response, and (v) long-term stability. Therefore, our approach enables to reveal the reaction complexity and is highly recommended for the photocatalytic NO<sub>x</sub> testing.

**Keywords:** photocatalysis; air purification; NO<sub>x</sub>; HONO; NO<sub>2</sub>; mass balance

**Citation:** Suchanek, J.; Vaneckova, E.; Dostal, M.; Mikyskova, E.; Brabec, L.; Zouzelka, R.; Rathousky, J. Methodology for Simultaneous Analysis of Photocatalytic deNO<sub>x</sub> Products. *Catalysts* **2022**, *12*, 661. <https://doi.org/10.3390/catal12060661>

Academic Editor: Gassan Hodaifa

Received: 9 May 2022

Accepted: 14 June 2022

Published: 16 June 2022

**Publisher's Note:** MDPI stays neutral with regard to jurisdictional claims in published maps and institutional affiliations.

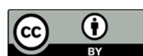

**Copyright:** © 2022 by the authors. Licensee MDPI, Basel, Switzerland. This article is an open access article distributed under the terms and conditions of the Creative Commons Attribution (CC BY) license (<http://creativecommons.org/licenses/by/4.0/>).

**Table S1.** Overview of the analytical methodologies used for detection of gaseous nitrogen-based species and ozone.

| Analyte                                                     | Method                                                    | LOD                       | Detection range    |
|-------------------------------------------------------------|-----------------------------------------------------------|---------------------------|--------------------|
| NO, NO <sub>x</sub>                                         | APNA 370<br>(Horiba)                                      | 0.5 ppbv                  | 1 % of whole range |
| N <sub>2</sub> O                                            | GC-MS@cryotrapping<br>(Lu et al. 2016, see in manuscript) | <0.5 ppbv                 | -                  |
| NO <sub>2</sub>                                             | CLAD-FIA<br>(Mikuska et al. 2008)                         | 0.5 ppbv                  | 3.0-655.0 ppbv     |
| HONO                                                        | CWEDD-FIA<br>(Mikuska et al. 2008, see in manuscript)     | 15 pptv                   | 0.045-450.0 ppbv   |
| HONO                                                        | FTIR – gas analyzer<br>(ThermoFisher Scientific)          | 50–200 ppb                | -                  |
| NO <sub>2</sub> <sup>-</sup> , NO <sub>3</sub> <sup>-</sup> | HPIC<br>(ThermoFisher Scientific)                         | 10, 50 ug L <sup>-1</sup> | -                  |
| O <sub>3</sub>                                              | CLAD-FIA<br>(Mikuska et al. 2008, see in manuscript)      | 0.3 ppbv                  | 1.4-349 ppbv       |

## Gaseous HONO analyzer

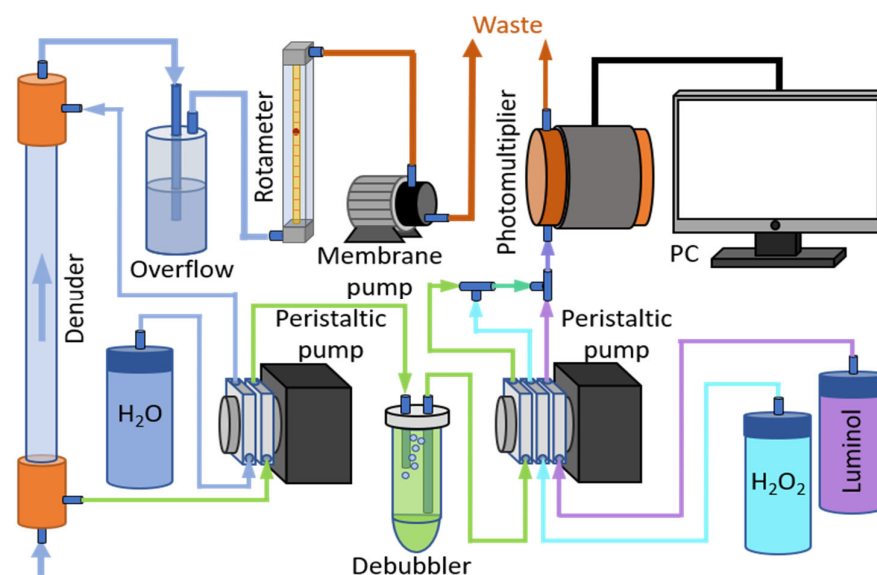**Figure S1.** Custom-made analytical system for HONO detection in air, designed and assembled by Mikuska and co-workers [1].

HONO was continuously monitored using non-commercial instrumentation (Figure S1), whose principle is described by Mikuska and co-workers [1]. A thin film of deionized water flows down the inner wall of the cylindrical wet effluent denuder 50 cm in length and internal diameter of 1 cm. The inflow and outflow of liquid is provided by a peristaltic pump (ISM 847, Ismatec). The inner wall of the denuder tube is specially roughed to ensure a wettable surface. The gas to be analyzed is sucked in the opposite direction to the liquid flow (0.5 mL.min<sup>-1</sup>) by a pump (HAILEA aco-328), the gas flow of 1.05 L.min<sup>-1</sup> being controlled by a rotameter (FL-5541SA, Omega). Liquid running down the wall

quantitatively absorbs HONO from the gas phase. Collected HONO is transported by a peristaltic pump (ISM 852, Ismatec) into a debubbler and further to an on-line detection system. HONO is detected as nitrite employing a continuous flow system where HONO is first mixed with  $\text{H}_2\text{O}_2$  reagent (consists of 1 mM  $\text{H}_2\text{O}_2$ , 0.3 M sulfuric acid, 1 mM EDTA, flow rate  $0.14 \text{ mL}\cdot\text{min}^{-1}$ ).  $\text{H}_2\text{O}_2$  in acid solution oxidizes nitrous acid to peroxyxynitrous acid, followed by a merge with an alkaline luminol solution (2 mM luminol, 0.6 M KOH, 3 mM EDTA, flow rate  $0.2 \text{ mL}\cdot\text{min}^{-1}$ ). Chemiluminescent light emitted during the reaction of peroxyxynitrite with luminol is detected by a photomultiplier (65 PK 518, Tesla Praha). The required constant flow is ensured by a suitable combination of peristaltic pumps and tubing (LMT 55, Tygon) of suitable inner diameter. For the transport of all liquids and gases tetrafluoroethylene tubes were employed.

#### $\text{NO}_2$ analyzer

The  $\text{NO}_2$  concentration was monitored using a custom-made analyzer (Figure S2) consisting of a peristaltic pump, reaction cell and measuring electronics. The principle of  $\text{NO}_2$  detection is described elsewhere [2–4]. The analyzed gas was sucked into the reaction cell by membrane pump (ANR 70110035, Thomas), the flow rate of  $0.46 \text{ L}\cdot\text{min}^{-1}$  being controlled by a 0.3 mm nozzle. A solution of luminol (97%, Sigma Aldrich) is introduced to the reaction vessel by a peristaltic pump (ISM 852, Ismatec) with flow rate  $0.2 \text{ mL}\cdot\text{min}^{-1}$  and afterwards goes down along the polyester wick. The continuous monitoring of  $\text{NO}_2$  in the air operates by detecting the chemiluminescence produced when  $\text{NO}_2$  encounters a wick wetted with a solution containing luminol. Intensity of emitted light is detected by photomultiplier (Hamamatsu R6094, maximum at 420 nm) operated at 600 V at the laboratory temperature of 22–25 °C.

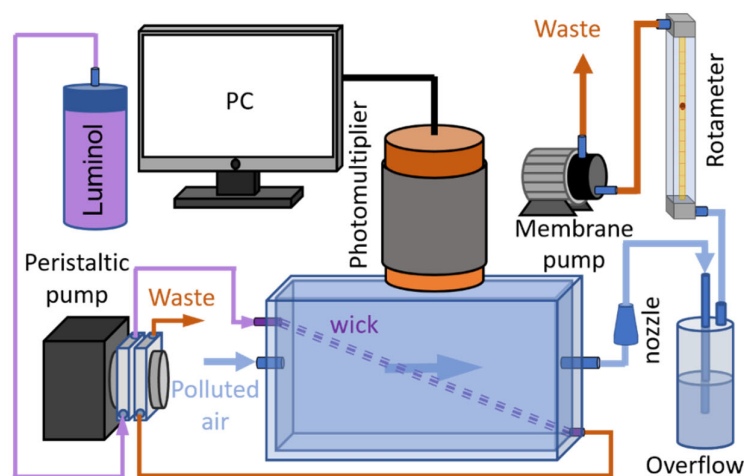

**Figure S2.** Custom-made analytical system for  $\text{NO}_2$  detection in air, designed and assembled by Mikuška and co-workers [3].

#### $\text{NO}/\text{NO}_2$ analyzer

Commercial  $\text{NO}_x$  analyzer APNA-370 (Horiba) was employed to monitor NO and  $\text{NO}+\text{NO}_2$  concentrations in the gas stream. Measuring principle is based on the cross modulation chemiluminescence method. NO is measured directly by its oxidation with  $\text{O}_3$  and subsequent detection of luminescence from the  $\text{NO}_2^*$  excited state, whereas  $\text{NO}_2$  is first converted into NO. Also reduction of gaseous HONO and  $\text{HNO}_3$  to NO cannot be excluded. Then the analyser would show either NO or the sum of  $\text{NO}_x$  concentrations except for  $\text{N}_2\text{O}$ .

## References

1. Mikuska, P.; Motyka, K.; Vecera, Z. Determination of nitrous acid in air using wet effluent diffusion denuder–FIA technique. *Talanta* **2008**, *77*, 635–641, doi:10.1016/j.talanta.2008.07.008.
2. Schiff, H.I.; Mackay, G.I.; Castledine, C.; Harris, G.W.; Tran, Q. Atmospheric measurements of nitrogen dioxide with a sensitive luminol instrument. In *Acidic Precipitation*; Springer, **1986**; pp. 105–114.
3. Mikuska, P.; Vecera, Z. Determination of nitrogen dioxide with a chemiluminescent aerosol detector. *Anal. Chem.* **1992**, *64*, 2187–2191, doi:10.1021/ac00042a029.
4. Mikuška, P.; Večeřa, Z. Effect of complexones and tensides on selectivity of nitrogen dioxide determination in air with a chemiluminescence aerosol detector. *Anal. Chim. Acta* **2000**, *410*, 159–165, doi:10.1016/S0003-2670(00)00710-8.
